# Supplementary material
Source: publisher site journal article supplement (https://www.dovepress.com/article/432368)
Supplement: Supplementary file 1 [file get_supplementary_file.php]

### Variable Importance Plot

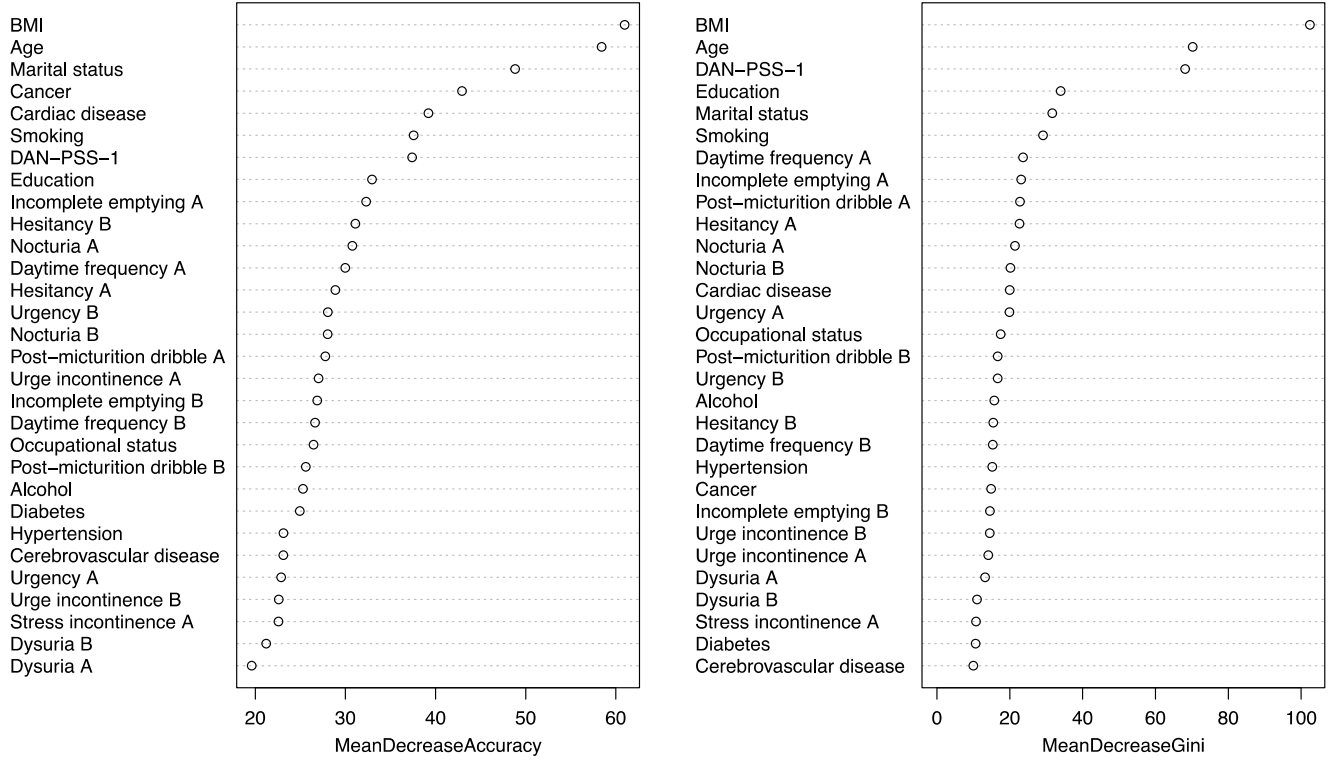

Abbreviations: BMI, body mass index; DAN-PSS-1, Danish Prostatic Symptom Score

**Supplementary Figure 1.** The variable importance plot of the random forest algorithm

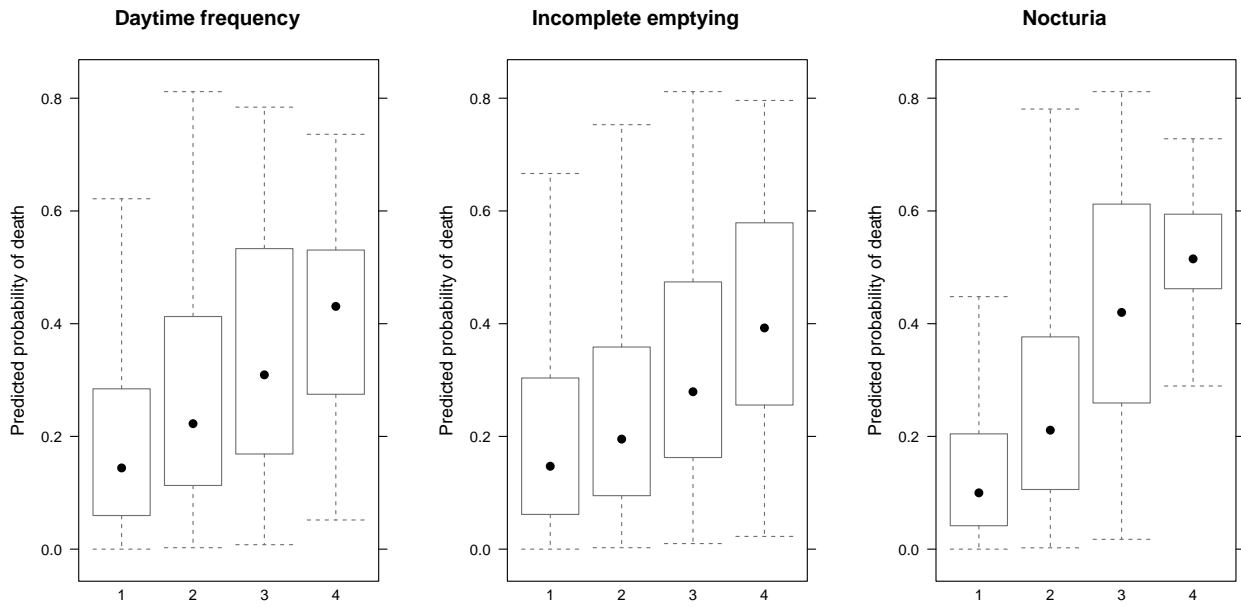

**Supplementary Figure 2.** The variation of predicted probability of death between the variable values for different LUTS variables (daytime frequency, incomplete emptying and nocturia).

**Supplementary Table 1.** Characteristics of the study population based on the questionnaire in each round.

|                                              | 1994      | 1999      | 2004      | 2009      | 2015      |
|----------------------------------------------|-----------|-----------|-----------|-----------|-----------|
| Number of men                                | 2034 (%)  | 2052 (%)  | 1830 (%)  | 1377 (%)  | 1097 (%)  |
| Year of birth                                |           |           |           |           |           |
| 1924                                         | 554 (27)  | 440 (21)  | 295 (16)  | 148 (11)  | 64 (6)    |
| 1934                                         | 706 (35)  | 715 (35)  | 629 (34)  | 468 (34)  | 357 (33)  |
| 1944                                         | 774 (38)  | 897 (43)  | 906 (50)  | 761 (55)  | 676 (62)  |
| Marital status                               |           |           |           |           |           |
| Married or cohabiting                        | 1612 (79) | 1600 (78) | 1399 (77) | 1051 (76) | 819 (75)  |
| Divorced                                     | 200 (10)  | 190 (9)   | 201 (10)  | 138 (10)  | 102 (9)   |
| Widower                                      | 88 (4)    | 109 (9)   | 116 (6)   | 113 (8)   | 111 (10)  |
| Single                                       | 131 (6)   | 127 (6)   | 109 (6)   | 69 (5)    | 55 (5)    |
| Occupational status                          |           |           |           |           |           |
| Working                                      | 781 (38)  | 732 (36)  | 444 (24)  | 100 (7)   | 16 (2)    |
| Retired                                      | 1020 (50) | 1196 (58) | 1288 (70) | 1268 (92) | 1078 (99) |
| Unemployed                                   | 222 (11)  | 109 (5)   | 96 (5)    | 9 (0.7)   | 0 (0)     |
| Education                                    |           |           |           |           |           |
| Primary school                               | 1034 (51) | 918 (45)  | 755 (41)  | 513 (37)  | 357 (33)  |
| Vocational school                            | 583 (29)  | 572 (28)  | 634 (35)  | 476 (35)  | 365 (33)  |
| Post-secondary level                         | 256 (13)  | 257 (13)  | 261 (14)  | 240 (17)  | 199 (18)  |
| University or university of applied sciences | 147 (7)   | 165 (8)   | 174 (10)  | 147 (11)  | 118 (11)  |
| Smoking                                      |           |           |           |           |           |
| Stopped smoking                              | 888 (44)  | 708 (35)  | 760 (42)  | 542 (39)  | 388 (35)  |
| Current smoker                               | 467 (23)  | 394 (19)  | 324 (18)  | 198 (14)  | 105 (10)  |
| BMI                                          |           |           |           |           |           |
| < 20                                         | 30 (2)    | 30 (2)    | 25 (1)    | 19 (1.4)  | 15 (1)    |
| 20-30                                        | 1648 (81) | 1602 (78) | 1413 (77) | 1067 (76) | 853 (78)  |
| >30                                          | 338 (17)  | 344 (17)  | 351 (19)  | 248 (18)  | 206 (19)  |
| Diabetes                                     | 157 (8)   | 180 (9)   | 224 (12)  | 227 (17)  | 262 (24)  |
| Cardiac disease                              | 371 (18)  | 402 (20)  | 427 (23)  | 368 (27)  | 343 (31)  |
| Hypertension                                 | 592 (29.) | 709 (35)  | 798 (44)  | 646 (47)  | 579 (53)  |
| Cerebrovascular disease                      | 129 (6)   | 125 (6)   | 110 (6)   | 89 (7)    | 99 (9)    |
| Cancer                                       | 61 (3)    | 107 (5)   | 173 (10)  | 186 (14)  | 185 (17)  |
| DAN-PSS-1                                    |           |           |           |           |           |
| 0-7                                          | 1673 (82) | 1187 (58) | 1017 (56) | 752 (55)  | 582 (53)  |
| 8-18                                         | 198 (10)  | 219 (11)  | 279 (15)  | 182 (13)  | 193 (18)  |
| ≥19                                          | 38 (2)    | 65 (3)    | 97 (5)    | 69 (5)    | 49 (5)    |

Abbreviations: BMI, body mass index; DAN-PSS-1, Danish Prostatic Symptom Score
